# Supplementary material for: Surveillance of U.S. Corporate Filings Provides a Proactive Approach to Inform Tobacco Regulatory Research Strategy
Source: Int J Environ Res Public Health. 2021 Mar 16;18(6):3067. doi: 10.3390/ijerph18063067 (PMC8002354; doi:10.3390/ijerph18063067)
Supplement: Supplementary file 1 [file ijerph-18-03067-s001.xlsx]

## Sheet: S1_CorporateFilingsAndEvents
Year	Date	Category	Description	Document Source	First Cross Reference	Second Cross Reference	Executive Officer (Generic)	Executive Officer (Generic)	Executive Officer (Generic)	Executive Officer (Generic)	Executive Officer (Generic)	Chief Executive Officer	Chief Product Officer	Chief Technology Officer	Chief Financial Officer	Chief Legal Officer	Chief Administrative Officer	Director	Director	Director	Director	Director	Director	Director
2011	2011-05-06	Corporate	Ploom, Inc Filed Form D, Notice of Exempt Offering of Securities, for an offering amount of $3,330,163 USD as Equity and Options ($3,230,163 sold to 5 investors as of fiiling date) . Not a merger.	sec.gov	021-159353	11815986	James Monsees	Adam Bowen										James Monsees	Adam Bowen	Tom Dykstra (Tao LLC)	Riaz Valeni (Ploom Investment LLC)
2015	2015-04-07	Corporate	Pax Labs, Inc Filed Form D, Notice of Exempt Offering of Securities, (Formerly known as Ploom, Inc); for an offering amount of $25,000,000 ($6,500,000 sold to 4 investors as of fiiling date) as Equity. Not a merger.	sec.gov	021-237458	15756033	James Monsees	Adam Bowen										James Monsees	Adam Bowen	Nicholas Pritzker (Tao Invest LLC)	Riaz Valeni (Ploom Investment LLC)	Harold Handelsman (c/o PAX Labs)
2015	2015-06-04	Corporate	Pax Labs, Inc Filed Amendment to Form D, Notice of Exempt Offering of Securities, (Formerly known as Ploom, Inc) for an offering amount of $46,685,837 ($46,685,837 sold to 54 investors as of fiiling date) as Equity. Not a merger.	sec.gov	021-237458	15912537	James Monsees	Adam Bowen										James Monsees	Adam Bowen	Nicholas Pritzker (Tao Invest LLC)	Riaz Valani (Ploom Investment LLC)	Harold Handelsman (c/o PAX Labs)
2016	2016-12-28	Corporate	Pax Labs, Inc Filed Form D, Notice of Exempt Offering of Securities, (Formerly known as Ploom, Inc) for an offering amount of $29,999,997 ($4,378,778 sold to 2 investors as of fiiling date) as Equity. Not a merger.	sec.gov	021-277167	162072405	James Monsees	Adam Bowen	Tyler Goldman	Timothy Danaher								James Monsees	Adam Bowen	Nicholas Pritzker (Tao Invest LLC)	Riaz Valani (Ploom Investment LLC)	Harold Handelsman (c/o PAX Labs)
2017	2017-03-17	Corporate	Pax Labs, Inc Filed Amendment to Form D, Notice of Exempt Offering of Securities, (Formerly known as Ploom, Inc) for an offering amount of $54,999,995 ($54,999,995 sold to 34 investors as of fiiling date) as Equity. Not a merger.	sec.gov	021-277167	17698100	James Monsees	Adam Bowen	Tyler Goldman	Timothy Danaher	Ashley Gould							James Monsees	Adam Bowen	Nicholas Pritzker (Tao Invest LLC)	Riaz Valani (Ploom Investment LLC)	Harold Handelsman (c/o PAX Labs)
2017	2017-12-19	Corporate	Juul Labs, Inc Filed Form D, Notice of Exempt Offering of Securities, (Formerly known as Ploom, Inc, Pax Inc) for an offering amount of $150,000,000 ($111,500,000 sold to 23 investors as of fiiling date) as Convertible Note. Date of first sale on 12/4/2017. Not a merger.	sec.gov	021-301126	171263574	James Monsees	Adam Bowen				Kevin Burns			Timothy Danaher			James Monsees	Adam Bowen	Nicholas Pritzker (JL Special LLC)	Riaz Valani (Ploom Investment LLC)	Harold Handelsman (c/o PAX Labs)	Zachary Frankel (c/o JUUL Labs)	HoYoung Huh (c/o JUUL Labs)
2018	2018-07-10	Corporate	Juul Labs, Inc Filed Form D, Notice of Exempt Offering of Securities, (Formerly known as Ploom, Inc, Pax Inc) for an offering amount of $1,250,000,000 ($650,000,000 sold as of fiiling date) as Equity. Date of first sale on 2018-06-26	sec.gov	021-316346	18945708	James Monsees	Adam Bowen				Kevin Burns			Timothy Danaher	Gerald Masoudi	Ashley Gould	James Monsees	Adam Bowen	Nicholas Pritzker (JL Special LLC)	Riaz Valani (Ploom Investment LLC)	Harold Handelsman (c/o JUUL Labs)	Zachary Frankel (c/o JUUL Labs)	Kevin Burns (c/o JUUL Labs)
2019	2019-08-19	Corporate	Juul Labs, Inc Filed Form D, Notice of Exempt Offering of Securities, (Formerly known as Ploom, Inc, Pax Inc) for an offering amount of $325,000,000 ($325,000,000 sold to 4 investors as of fiiling date) as Equity and Debt. Date of first sale on 2019-08-02. Not a merger.	sec.gov	021-346844	191034483	James Monsees	Adam Bowen				Kevin Burns			Timothy Danaher	Gerald Masoudi	Ashley Gould	James Monsees	Adam Bowen	Nicholas Pritzker (JL Special LLC)	Riaz Valani (Ploom Investment LLC)	Harold Handelsman (c/o JUUL Labs)	Zachary Frankel (c/o JUUL Labs)	Kevin Burns (c/o JUUL Labs)
2019	2019-08-30	Corporate	Juul Labs, Inc Filed Amendment to Form D, Notice of Exempt Offering of Securities, (Formerly known as Ploom, Inc, Pax Inc) for an offering amount of $800,176,874 ($785,176,874 sold to 14 investors as of fiiling date) as Equity and Debt. Date of first sale on 2019-08-02. Not a merger.	sec.gov	021-346844	191070199						Kevin Burns	James Monsees	Adam Bowen	Timothy Danaher	Gerald Masoudi	Ashley Gould	James Monsees	Adam Bowen	Nicholas Pritzker (JL Special LLC)	Riaz Valani (Ploom Investment LLC)	Harold Handelsman (c/o JUUL Labs)	Zachary Frankel (c/o JUUL Labs)	Kevin Burns (c/o JUUL Labs)
2020	2020-02-07	Corporate	Juul Labs, Inc Filed Form D, Notice of Exempt Offering of Securities, (Formerly known as Ploom, Inc, Pax Inc) for an offering amount of $721,555,937 ($721,555,937 sold to 20 investors as of fiiling date) as Equity and Debt. Date of first sale on 2020-02-03. Not a merger.	sec.gov	021-360037	20586573						K.C. Crosthwaite	James Monsees	Adam Bowen	Saurabh Sinha	Gerald Masoudi		James Monsees	Adam Bowen	Nicholas Pritzker (c/o JUUL Labs)	Riaz Valani (c/o JUUL Labs LLC)	Harold Handelsman (c/o JUUL Labs)	Zachary Frankel (c/o JUUL Labs)	K.C. Crosthwaite (c/o JUUL Labs)
2007	2007-03-12	Corporate	JUUL LABS, INC files as a corporation in Delaware	corp.delaware.gov	DDC File Number 4315504
2007	2007-05-30	Corporate	PLOOM INVESTMENT LLC filed as Limited Liability Company in Delaware	corp.delaware.gov	DDC File Number 4361140
2008	2008-01-29	Corporate	PAAX, INC files as a corporation in Delaware	corp.delaware.gov	DDC File Number 4496618
2017	2017-01-23	Corporate	PLOOM INVESTMENT II LLC filed as Limited Liability Company in Delaware	corp.delaware.gov	DDC File Number 6293192
2019	2019-01-19	Corporate	JUUL LABS INTERNATIONAL, INC files as a corporation in Delaware	corp.delaware.gov	DDC File Number 7241304
2020	2020-12-12	Corporate	JUUL LABS EXPORTS, LLC	corp.delaware.gov	DDC File Number 4515814

## Sheet: S2_USRegulation
Year	Date	Subtitle	Category	Result	Citation
2009	2009-06-22	Family Smoking Prevention and Tobacco Control Act	US Regulation	Family Smoking Prevention and Tobacco Control Act	Family Smoking Prevention and Tobacco Control Act, 2009
2010	2010-12-07	ENDS fall under FDA regulations	US Regulation	Ruling that products derived from tobacco can be regulated under Tobacco Control Act	Sottera, Inc. dba NJOY v. FDA, 627 F.3d 891 [D.C. Cir. 2010]
2016	2016-05-10	Deeming Rule	US Regulation	Deeming Tobacco Products To Be Subject to the Federal Food, Drug, and Cosmetic Act, as Amended by the Family Smoking Prevention and Tobacco Control Act; Restrictions on the Sale and Distribution of Tobacco Products and Required Warning Statements for Tobacco Products	81 FR 28973
2018	2018-07-10	FDA requests info from JUUL	US Regulation	The FDA requested information related to marketing practices from Juul Labs™ and several other e-cigarette manufacturers	Becker 2018, FDA, 2018
2018	2018-07-10	FDA issues warnings	US Regulation	FDA began to issue thousands warning letters and civil money penalty complaints to retailers who were illegally selling Juul® and other e-cigarette products to minors	2019 Hoffman, FDA, 2018
2018	2018-10-01	FDA gives ultimatum	US Regulation	FDA gave Juul and several other e-cigarette makers 60 days to comeup with ways to demonstrate steps that they would take to keep their products out of the hands of minors or the FDA would ban flavored e-cigarette products	Becker.2018 2018 Hoffman, 2018
2018	2018-10-01	FDA raids JUUL Labs	US Regulation	October 2018, the FDA raided Juul Labs’™ headquarters in San Francisco with a surprise onsite inspection. During this inspection, the FDA obtained thousands of documents from Juul Labs™ related to marketing	Carleton 2018 ,Becker, 2018
2018	2018-11-01	FDA releases age-verification plan	US Regulation	FDA released their plan to implement age-verification guidelines that must be followed for online sales	Lavito, 2018 FDA, 2018
2018	2018-11-15	FDA declared epidemic	US Regulation	Dr. Scott Gottlieb’s public declaration that “youth use of electronic cigarettes has reached an epidemic proportion”	FDA, 2018
2018	2018-11-18	FDA anounces plan of action	US Regulation	FDA announced a plan to limit the sale of flavored cartridge-based e-liquids to smoke shops and online.	FDA, 2018
2019	2019-03-01	New nicotine warning requirements	US Regulation	federal regulation was passed requiring a nicotine warning on the front of e-cigarette products	US FDA
2019	2019-10-09	FDA issues warning	US Regulation	FDA warns JUUL Labs for marketing unauthorized modified risk tobacco products	US FDA,FDA, 2019

## Sheet: S3_USPatentApplications
Year	Category	Result	Citation
2007	Patent Application	Method and system for vaporization of a substance	20070283972
2009	Patent Application	AEROSOL DEVICES AND METHODS FOR INHALING A SUBSTANCE AND USES THEREOF	20090151717
2013	Patent Application	LOW TEMPERATURE ELECTRONIC VAPORIZATION DEVICE AND METHODS	20130312742
2014	Patent Application	MULTIPLE HEATING ELEMENTS WITH SEPARATE VAPORIZABLE MATERIALS IN AN ELECTRIC VAPORIZATION DEVICE	20140366898
2015	Patent Application	VAPORIZATION DEVICE SYSTEMS AND METHODS	20150208729
2016	Patent Application	CALIBRATED DOSE CONTROL	20160157524
2016	Patent Application	DEVICES FOR VAPORIZATION OF A SUBSTANCE	20160338412
2016	Patent Application	ELECTRONIC VAPORIZATION DEVICE	20160262459
2016	Patent Application	PORTABLE DEVICES FOR GENERATING AN INHALABLE VAPOR	20160345631
2016	Patent Application	VAPORIZER APPARATUS	20160374399
2017	Patent Application	CARTRIDGE FOR USE WITH A VAPORIZER DEVICE	20170035115
2017	Patent Application	SECURELY ATTACHING CARTRIDGES FOR VAPORIZER DEVICES	20170231282
2017	Patent Application	SYSTEMS AND METHODS FOR AEROSOLIZING A SMOKEABLE MATERIAL	20170181468
2017	Patent Application	VAPORIZATION DEVICE WITH LIP SENSING	20170258142
2018	Patent Application	CONTROL OF AN ELECTRONIC VAPORIZER	20180093054
2018	Patent Application	LEAK-RESISTANT VAPORIZER DEVICE	20180077967
2018	Patent Application	ON-DEMAND, PORTABLE CONVECTION VAPORIZER	20180000160
2019	Patent Application	Cartridges for Vaporizer Devices	20190373953
2019	Patent Application	ELECTRONIC VAPORIZER SESSIONING	20190158938
2019	Patent Application	VAPORIZATION DEVICE CONTROL SYSTEMS AND METHODS	20190069599
2020	Patent Application	Airflow Management for Vaporizer Device	20200022417
2020	Patent Application	Cartridge Used in a Smoking Device for Vaporization	20200221759
2020	Patent Application	CARTRIDGE-BASED HEAT NOT BURN VAPORIZER	20200037669
2020	Patent Application	CONNECTED VAPORIZER DEVICE SYSTEMS	20200000143
2020	Patent Application	USER INTERFACE AND USER EXPERIENCE FOR A VAPORIZER DEVICE	20200352249
2020	Patent Application	Vaporizer Device With More Than One Heating Element	20200146352
2020	Patent Application	Vaporizer Including Positive Temperature Coefficient of Resistivity (PTCR) Heating Element	20200077707
2009	Patent Application	METHOD AND SYSTEM FOR VAPORIZATION OF A SUBSTANCE	20090260642
2013	Patent Application	LOW TEMPERATURE ELECTRONIC VAPORIZATION DEVICE AND METHODS	20130042865
2015	Patent Application	AEROSOL DEVICES AND METHODS FOR INHALING A SUBSTANCE AND USES THEREOF	20150157056
2016	Patent Application	VAPORIZATION DEVICE SYSTEMS AND METHODS	20160174611
2016	Patent Application	VAPORIZER APPARATUS	20160366947
2018	Patent Application	CARTRIDGE FOR USE WITH A VAPORIZER DEVICE	20180070649
2018	Patent Application	CONTROL OF AN ELECTRONIC VAPORIZER	20180043114
2018	Patent Application	SECURELY ATTACHING CARTRIDGES FOR VAPORIZER DEVICES	20180070646
2019	Patent Application	Devices for Vaporization of a Substance	20190289916
2020	Patent Application	Calibrated Dose Control	20200120987
2020	Patent Application	Multiple Heating Elements with Separate Vaporizable Materials in an Electric Vaporization Device	20200275693
2020	Patent Application	ON-DEMAND, PORTABLE CONVECTION VAPORIZER	20200163378
2020	Patent Application	VAPORIZATION DEVICE WITH LIP SENSING	20200170302
2009	Patent Application	METHOD AND SYSTEM FOR VAPORIZATION OF A SUBSTANCE	20090260641
2016	Patent Application	LOW TEMPERATURE ELECTRONIC VAPORIZATION DEVICE AND METHODS	20160374400
2017	Patent Application	VAPORIZATION DEVICE SYSTEMS AND METHODS	20170095005
2018	Patent Application	CARTRIDGE FOR USE WITH A VAPORIZER DEVICE	20180070644
2018	Patent Application	VAPORIZER APPARATUS	20180317557
2019	Patent Application	AEROSOL DEVICES AND METHODS FOR INHALING A SUBSTANCE AND USES THEREOF	20190261686
2019	Patent Application	Devices for Vaporization of a Substance	20190223510
2020	Patent Application	Securely Attaching Cartridges for Vaporizer Devices	20200260785
2015	Patent Application	METHOD AND SYSTEM FOR VAPORIZATION OF A SUBSTANCE	20150150308
2017	Patent Application	LOW TEMPERATURE ELECTRONIC VAPORIZATION DEVICE AND METHODS	20170079331
2018	Patent Application	CARTRIDGE FOR USE WITH A VAPORIZER DEVICE	20180070642
2018	Patent Application	VAPORIZATION DEVICE SYSTEMS AND METHODS	20180360130
2018	Patent Application	VAPORIZER APPARATUS	20180116291
2018	Patent Application	VAPORIZATION DEVICE SYSTEMS AND METHODS	20180360129
2018	Patent Application	VAPORIZER APPARATUS	20180098578
2018	Patent Application	VAPORIZATION DEVICE SYSTEMS AND METHODS	20180103686
2018	Patent Application	VAPORIZATION DEVICE SYSTEMS AND METHODS	20180092406
2018	Patent Application	VAPORIZATION DEVICE SYSTEMS AND METHODS	20180092405
2018	Patent Application	VAPORIZATION DEVICE SYSTEMS AND METHODS	20180070648
2018	Patent Application	VAPORIZATION DEVICE SYSTEMS AND METHODS	20180070647
2018	Patent Application	VAPORIZATION DEVICE SYSTEMS AND METHODS	20180070645
2018	Patent Application	VAPORIZATION DEVICE SYSTEMS AND METHODS	20180070643
2018	Patent Application	VAPORIZATION DEVICE SYSTEMS AND METHODS	20180064175
2018	Patent Application	VAPORIZATION DEVICE SYSTEMS AND METHODS	20180064174

## Sheet: S4_USTrademarkApplications
Year	Date	Subtitle	Category	Result	Citation
2006	2006-07-20	Ploom logo trademarked	Trademark	Ploom logo trademarked with USPTO by JT International SA CORPORATION SWITZERLAND with Bowen, Adam and Monsees, James as owners	PLOOM®. 2006. Bown, Adam, Monsees, James, JT International SA Corporation Switzerland, San Francisco, CA, USA
2011	2011-12-01	Ploom logo trademarked	Trademark	Ploom logo trademarked by JT INTERNATIONAL SA CORPORATION SWITZERLAND with Ploom, Inc. CORPORATION DELAWARE - cancelled August 30 2019	ploom®. 2011.JT INTERNATIONAL SA CORPORATION SWITZERLAND, Geneva, SWITZERLAND
2012	2012-02-03	Ploom logo trademarked	Trademark	Ploom logo trademarked by JT INTERNATIONAL SA CORPORATION SWITZERLAND with Ploom, Inc. CORPORATION DELAWARE cancelled April 19 2019	ploom®. 2012.JT INTERNATIONAL SA CORPORATION SWITZERLAND, Geneva, SWITZERLAND
2014	2014-01-03	JUUL trademark filed	Trademark		Juul®. 2014. PAX Labs, San Francisco, CA, USA
2015	2015-02-23	PAX Labs logo trademarked	Trademark	PAX Labs logo trademarked by PAX Labs, Inc. CORPORATION DELAWARE abandond December 10, 2018	PAX LABS®. 2015. PAX Labs, Inc., San Francisc0, CA, USA
2015	2015-07-06	Juul simple logo trademark filed	Trademark	Juul simple logo trademark filed with USPTO	Juul®. 2015. PAX Labs, Inc., San Francisco, CA, USA
2016	2016-02-26	JTI trademarks PLOOM TECH	Trademark	PLOOM TECH Logo trademark filed with USPTO by JT International SA SOCIÉTÉ ANONYME (SA) SWITZERLAND	PLOOM TECH®. 2016.JT INTERNATIONAL SA CORPORATION SWITZERLAND, Geneva, SWITZERLAND
2016	2016-08-03	Ploom logo trademarked	Trademark	Ploom logo trademarked by JT International SA CORPORATION SWITZERLAND	PLOOM®. 2016. JT INTERNATIONAL SA CORPORATION SWITZERLAND, Geneva, SWITZERLAND
2017	2017-03-13	JUUL. MADE FOR SWITCHING filed as trademark	Trademark	JUUL. MADE FOR SWITCHING filed as trademark filed with USPTO- abandond March 13, 2020	JUUL. MADE FOR SWITCHING®. 2017. JUUL Labs, Inc., San Francisco, CA, USA
2017	2017-05-18	Juul Labs logo trademark filed	Trademark	Juul Labs logo trademark filed with USPTO	JUUL LABS®. 2017. JUUL Labs, Inc., Washington D.C., USA
2017	2017-10-24	Juul Labs stacked logo trademark filed	Trademark	Juul Labs stacked logo trademark filed with USPTO	JUUL LABS®. 2017. JUUL Labs, Inc., Washington D.C., USA
2018	2018-01-10	PAX Labs logo trademarke abondand	Trademark	PAX Labs logo trademarked from Feburary 2015 abandond	PAX LABS®. 2015. PAX Labs, Inc., San Francisco, CA, USA
2018	2018-03-27	JUUL Hexagon logo filed - latered abandoned	Trademark	JUUL Hexagon logo filed - abandoned January 18, 2019	JUUL®. 2018. JUUL Labs, Inc., Washington D.C., USA
2018	2018-04-10	Juul Vapor trademark filed	Trademark	Juul Vapor trademark filed with USPTO- Abandond January 18, 2019	JUUL VAPOR®. 2018. JUUL Labs, Inc., San Francisco, CA, USA
2018	2018-06-11	JuulTalk trademark filed	Trademark	JUULTALK trademark filed - abandond January 18, 2019	JUUL TALK®. 2018. JUUL Labs, Inc., San Francisco, CA, USA
2018	2018-07-25	Juul Hexagon trademark filed	Trademark	Juul Hexagon trdemark filed with USPTO by JUUL Labs, Inc. CORPORATION DELAWARE	JUUL®. 2018. JUUL Labs, Inc., Washington D.C., USA
2018	2018-11-05	PAX Labs logo trademarked	Trademark	PAX Labs logo trademarked by PAX Labs, Inc. CORPORATION DELAWARE	PAX LABS®. 2015. PAX Labs, Inc., San Francisco, CA, USA
2018	2018-12-16	PAX trademark filed	Trademark	Pax with styalized X filed with USPTO	PAX®. 2018. PAX Labs, Inc., San Francisco, CA, USA
2019	2019-01-18	JUUL Hexagon logo abandoned	Trademark	JUUL Hexagon logo from March 2018 abandoned	JUUL®. 2018. JUUL Labs, Inc., Washington D.C., USA
2019	2019-01-18	JuulTalk trademark Abandond	Trademark	JUULTALK trademark ffrom June 2018 abandond	JUUL TALK®. 2018. JUUL Labs, Inc., San Francisco, CA, USA
2019	2019-01-18	Juul Vapor trademark abandond	Trademark	Juul Vapor trademark froom April 2018 Abandond	JUUL VAPOR®. 2018. JUUL Labs, Inc., San Francisco, CA, USA
2019	2019-02-05	JuulPods trademark filed	Trademark	JuulPods trademark filed by JUUL Labs, Inc. CORPORATION DELAWARE	JUULPODS®. 2019. JUUL Labs, Inc.,Washington D.C., USA
2019	2019-04-19	Ploom logo cancelled	Trademark	Ploom logo trademarked by JT INTERNATIONAL SA CORPORATION SWITZERLAND with Ploom, Inc. CORPORATION DELAWARE from Feburary 3 2012 cancelled	ploom®. 2012.JT INTERNATIONAL SA CORPORATION SWITZERLAND, Geneva, SWITZERLAND
2019	2019-07-19	Juul C1 Trademark filed	Trademark	JUULC1 trademark files with USPTO	JUUL C1®. 2019. JUUL Labs, Inc.,Washington D.C., USA
2019	2019-07-19	Juul C2 Trademark filed	Trademark	JUULC2 trademark files with USPTO	JUUL C2®. 2019. JUUL Labs, Inc.,Washington D.C., USA
2019	2019-07-30	JUULPASS Trademark filed	Trademark	JUULPASS trademark filed by JUUL Labs, Inc. CORPORATION DELAWARE	JUUL PASS®. 2019. JUUL Labs, Inc.,Washington D.C., USA
2019	2019-08-30	Ploom logo cancelled	Trademark	Ploom logo trademarked by JT INTERNATIONAL SA CORPORATION SWITZERLAND with Ploom, Inc. CORPORATION DELAWARE from December 1 2011 cancelled	ploom®. 2011.JT INTERNATIONAL SA CORPORATION SWITZERLAND, Geneva, SWITZERLAND
2019	2019-10-22	Juul C3 Trademark filed	Trademark	JUULC3 trademark files with USPTO	JUUL C3®. 2019. JUUL Labs, Inc.,Washington D.C., USA
2019	2019-10-25	JuulPod trademark filed	Trademark	JuulPods trademark filed by JUUL Labs, Inc. CORPORATION DELAWARE	JUULPOD®. 2019. JUUL Labs, Inc.,Washington D.C., USA
2020	2020-02-13	PLOOM logo trademarked by JTI	Trademark	PLOOM logo trademarked by JT International SA	ploom®. 2020.JT INTERNATIONAL SA CORPORATION SWITZERLAND, Geneva, SWITZERLAND
2020	2020-03-13	JUUL. MADE FOR SWITCHING mark abondand	Trademark	JUUL. MADE FOR SWITCHING trademark from July 2017 abandond	JUUL. MADE FOR SWITCHING®. 2017. JUUL Labs, Inc., San Francisco, CA, USA
2020	2020-03-18	PAX 3 Trademark	Trademark	PAX 3 Trademark filed by PAX Labs, Inc	PAX®. 2020. PAX Labs, Inc., San Francisco, CA, USA

## Sheet: S5_US_PatentGrants
Priority Date	Filing Date	Publication Date	Grant Date	Type	Utility Patent Number	Patent Title	Assignee	Inventors
2016-03-10	2019-07-16	2020-12-01	2020-12-01	Utility Patent	US-10849366-B2	Vaporization device with lip sensing	Pax Labs, Inc.	Nicholas J. Hatoon, James Monsees, Adam Bowen
2014-02-06	2018-07-10	2020-07-14	2020-07-14	Utility Patent	US-10709173-B2	Vaporizer apparatus	Juul Labs, Inc.	James Monsees, Adam Bowen, Steven Christensen, Joshua Morenstein, Christopher Nicholas HibmaCronan
2013-12-23	2017-12-06	2018-10-30	2018-10-30	Utility Patent	US-10111470-B2	Vaporizer apparatus	Juul Labs, Inc.	James Monsees, Adam Bowen, Steven Christensen, Joshua Morenstein, Christopher Nicholas HibmaCronan
2013-12-23	2017-12-05	2018-08-14	2018-08-14	Utility Patent	US-10045568-B2	Vaporization device systems and methods	Juul Labs, Inc.	James Monsees, Adam Bowen, Steven Christensen, Joshua Morenstein, Christopher Nicholas HibmaCronan
2013-12-23	2017-12-05	2020-06-02	2020-06-02	Utility Patent	US-10667560-B2	Vaporizer apparatus	Juul Labs, Inc.	Ariel Atkins, Adam Bowen, Steven Christensen, Christopher Nicholas HibmaCronan, Aaron KELLER, James Monsees, Joshua Morenstein, Bryan White
2013-12-23	2017-11-21	2018-09-11	2018-09-11	Utility Patent	US-10070669-B2	Cartridge for use with a vaporizer device	Juul Labs, Inc.	James Monsees, Adam Bowen, Steven Christensen, Joshua Morenstein, Christopher Nicholas HibmaCronan
2013-12-23	2017-11-21	2019-04-23	2019-04-23	Utility Patent	US-10264823-B2	Vaporization device systems and methods	Juul Labs, Inc.	James Monsees, Adam Bowen, Steven Christensen, Joshua Morenstein, Christopher Nicholas HibmaCronan
2013-12-23	2017-11-16	2018-08-14	2018-08-14	Utility Patent	US-10045567-B2	Vaporization device systems and methods	Juul Labs, Inc.	James Monsees, Adam Bowen, Steven Christensen, Joshua Morenstein, Christopher Nicholas HibmaCronan
2013-12-23	2017-11-16	2018-11-06	2018-11-06	Utility Patent	US-10117466-B2	Vaporization device systems and methods	Juul Labs, Inc.	James Monsees, Adam Bowen, Nicholas Jay Hatoon, Steven Christensen, Joshua Morenstein, Christopher Nicholas HibmaCronan
2013-12-23	2017-11-16	2018-10-23	2018-10-23	Utility Patent	US-10104915-B2	Securely attaching cartridges for vaporizer devices	Juul Labs, Inc.	Adam Bowen, Steven Christensen, James Monsees, Joshua Morenstein, Christopher Nicholas HibmaCronan
2013-12-23	2017-11-14	2020-07-07	2020-07-07	Utility Patent	US-10701975-B2	Vaporization device systems and methods	Juul Labs, Inc.	Adam Bowen, Steven Christensen, Christopher Nicholas HibmaCronan, James Monsees, Joshua Morenstein
2013-12-23	2017-11-14	2018-11-06	2018-11-06	Utility Patent	US-10117465-B2	Vaporization device systems and methods	Juul Labs, Inc.	James Monsees, Adam Bowen, Steven Christensen, Joshua Morenstein, Christopher Nicholas HibmaCronan
2013-12-23	2017-11-14	2018-08-28	2018-08-28	Utility Patent	US-10058130-B2	Cartridge for use with a vaporizer device	Juul Labs, Inc.	James Monsees, Adam Bowen, Steven Christensen, Joshua Morenstein, Christopher Nicholas HibmaCronan
2016-06-16	2017-06-16	2019-12-31	2019-12-31	Utility Patent	US-10517331-B2	On-demand, portable convection vaporizer	Juul Labs, Inc.	Ariel Atkins, Adam Bowen, Alexander J. Gould, Nicholas J. Hatoon, Esteban Leon Duque, Kevin Lomeli, James Monsees, Matthew J. Taschner
2016-03-10	2017-03-10	2019-09-10	2019-09-10	Utility Patent	US-10405582-B2	Vaporization device with lip sensing	Pax Labs, Inc.	Nicholas J. Hatoon, James Monsees, Adam Bowen
2013-12-23	2016-12-15	2018-08-28	2018-08-28	Utility Patent	US-10058129-B2	Vaporization device systems and methods	Juul Labs, Inc.	James Monsees, Adam Bowen, Steven Christensen, Joshua Morenstein, Christopher Nicholas HibmaCronan
2013-12-23	2016-09-06	2018-09-18	2018-09-18	Utility Patent	US-10076139-B2	Vaporizer apparatus	Juul Labs, Inc.	James Monsees, Adam Bowen, Steven Christensen, Joshua Morenstein, Christopher Nicholas HibmaCronan
2013-12-23	2016-09-06	2018-12-25	2018-12-25	Utility Patent	US-10159282-B2	Cartridge for use with a vaporizer device	Juul Labs, Inc.	James Monsees, Adam Bowen, Steven Christensen, Joshua Morenstein, Christopher Nicholas HibmaCronan
2005-07-19	2016-05-26	2019-04-02	2019-04-02	Utility Patent	US-10244793-B2	Devices for vaporization of a substance	Juul Labs, Inc.	James Monsees, Adam Bowen, Patrick Myall, Krista Hunter
2013-12-23	2016-02-25	2017-01-24	2017-01-24	Utility Patent	US-9549573-B2	Vaporization device systems and methods	Pax Labs, Inc.	James Monsees, Adam Bowen, Nicholas Jay Hatoon, Steven Christensen, Kevin Lomeli, Ariel Atkins
2014-12-05	2015-12-04	2019-12-24	2019-12-24	Utility Patent	US-10512282-B2	Calibrated dose control	Juul Labs, Inc.	Adam Bowen, James Monsees, Ariel Atkins, Bradley INGEBRETHSEN, Esteban Leon Duque
2007-12-18	2015-02-18	2019-03-19	2019-03-19	Utility Patent	US-10231484-B2	Aerosol devices and methods for inhaling a substance and uses thereof	Juul Labs, Inc.	Adam Bowen, James Monsees
2005-07-19	2014-12-19	2020-11-17	2020-11-17	Utility Patent	US-10834964-B2	Method and system for vaporization of a substance	Juul Labs, Inc.	James Monsees, Adam Bowen
2013-06-14	2014-06-13	2020-05-19	2020-05-19	Utility Patent	US-10653180-B2	Multiple heating elements with separate vaporizable materials in an electric vaporization device	Juul Labs, Inc.	James Monsees, Adam Bowen
2011-08-16	2012-08-16	2016-08-09	2016-08-09	Utility Patent	US-9408416-B2	Low temperature electronic vaporization device and methods	Pax Labs, Inc.	James Monsees, Adam Bowen, Patrick Myall, Krista Hunter
2005-07-19	2009-06-10	2014-12-23	2014-12-23	Utility Patent	US-8915254-B2	Method and system for vaporization of a substance	Ploom, Inc.	James Monsees, Adam Bowen
2005-07-19	2009-06-10	2015-01-06	2015-01-06	Utility Patent	US-8925555-B2	Method and system for vaporization of a substance	Ploom, Inc.	James Monsees, Adam Bowen
2007-12-18	2008-12-16	2015-03-31	2015-03-31	Utility Patent	US-8991402-B2	Aerosol devices and methods for inhaling a substance and uses thereof	Pax Labs, Inc.	Adam Bowen, James Monsees
2005-07-19	2006-07-11	2017-06-13	2017-06-13	Utility Patent	US-9675109-B2	Method and system for vaporization of a substance	J. T. International Sa	James Monsees, Adam Bowen
				Design Patent	D905,601	Case
				Design Patent	D903,192	Vaporizer accessory
				Design Patent	D902,244	Display screen or portion thereof with animated graphical user interface
				Design Patent	D902,054	Packaging
				Design Patent	D901,763	Charging dock
				Design Patent	D895,197	Vaporizer device
				Design Patent	D894,479	Vaporizer device
				Design Patent	D892,734	Charging dock
				Design Patent	D892,041	Charging dock
				Design Patent	D889,739	Case
				Design Patent	D889,035	Case
				Design Patent	D887,975	Charging dock
				Design Patent	D886,638	Packaging
				Design Patent	RE47,994	Charging device for electronic vaporization device
				Design Patent	D877,971	Vaporizer device with cartridge
				Design Patent	D876,008	Case
				Design Patent	D861,975	Vaporizer device with cartridges
				Design Patent	D860,523	Case
				Design Patent	D858,870	Vaporizer cartridge
				Design Patent	D858,869	Vaporizer cartridge
				Design Patent	D858,868	Vaporizer cartridge
				Design Patent	D842,536	Vaporizer cartridge
				Design Patent	D825,102	Vaporizer device with cartridge
